# Supplementary material for: Efficient CO2 absorption by azolide-based deep eutectic solvents
Source: Royal Society of Chemistry journal article supplement (doi:10.1039/c8cc10085c), 2019-01-01
Supplement: c8cc10085c1.pdf [file c8cc10085c1.pdf]

**Supporting information**

Efficient CO<sub>2</sub> absorption by azolide-based deep eutectic solvents

Ge Cui, Meng Lv, and Dezhong Yang\*

*School of Science, China University of Geosciences, Beijing 100083, China*

Corresponding Author: yangdz@cugb.edu.cn

## Experimental section

**Materials and characterizations:** Tetraethylammonium hydroxide (35% w/w ) water solution and the exchange resin (OH<sup>-</sup> type) were purchased from Alfa Aesar. Imiazole (99%) and Ethylene glycol (99.5%, Super dry) were obtained from J&K scientific. Ethylene glycol was dried by 4Å molecular sieve prior to use. 1,2,4-Triazole was provide by Beijing Ouhe Technology Co., LTD. Tetraethylphosphonium bromide ([P<sub>2222</sub>]<sup>+</sup>Br<sup>-</sup>) was purchased from TCI. The infrared spectra were recorded on a PerkinElmer Frontier FTIR spectrometer on a KBr disk. The <sup>1</sup>H NMR spectra were taken on a Bruker spectrometer (400 MHz) and the <sup>13</sup>C NMR spectra were recorded at 100.6 MHz, using the d<sub>6</sub>-DMSO as the internal reference.

**Synthesis of azolide ILs.** All the azolide ILs were prepared based on the reported procedure.<sup>[1]</sup> Typically, for the synthesis of [P<sub>2222</sub>][Triz], a solution of [P<sub>2222</sub>][OH] in water was prepared from [P<sub>2222</sub>][Br] using the anion-exchange resin method. The concentration of [P<sub>2222</sub>][OH] in water solution was titrated with potassium hydrogen phthalate. Equimolar 1,2,4-triazole was added to the water solution of [P<sub>2222</sub>][OH]. After the mixture was stirred for 2 hours at room temperature, the water in the solution was removed by using rotary evaporation at 70 °C. The obtained product was dried under vacuum at 80 °C.

**Synthesis of DESs:** The azolide IL and ethylene glycol were simply mixed at the molar ratio of 1:2. Then, the mixture was stirred at 80 °C until a liquid was formed, which was cooled down to room temperature prior to use.

**Absorption and Desorption of CO<sub>2</sub>:** A DESs (~2g) was added into a glass tube with an inner diameter of 10 mm. The glass tube was partially immersed into the water bath at 25 °C. Carbon dioxide was bubbled through the needle into the DESs at a flow rate of 50 ml / min. The weight of the absorbent was weighed at regular intervals using an electronic analytical balance with an accuracy of ±0.1 mg.

In the desorption of CO<sub>2</sub>, N<sub>2</sub> of atmospheric pressure (50 mL /min) was bubbled through the solutions at required temperature. The weight of the solution was

determined at regular intervals during the desorption process by the electronic balance.

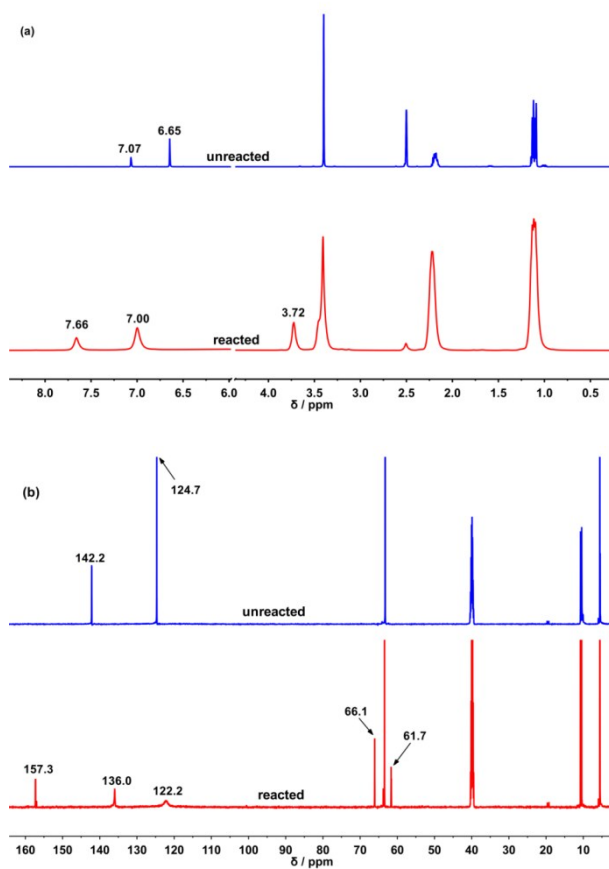

Fig. S1. The  $^1\text{H}$  (a) and  $^{13}\text{C}$  NMR (b) spectra of  $[\text{P}_{2222}][\text{Im}]\text{-EG}$  (1:2) before and after  $\text{CO}_2$  uptake.

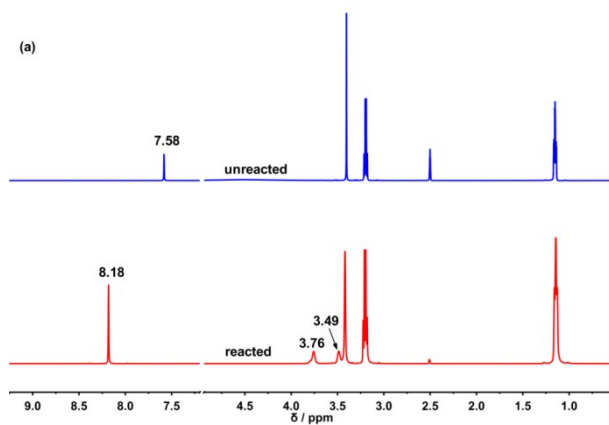

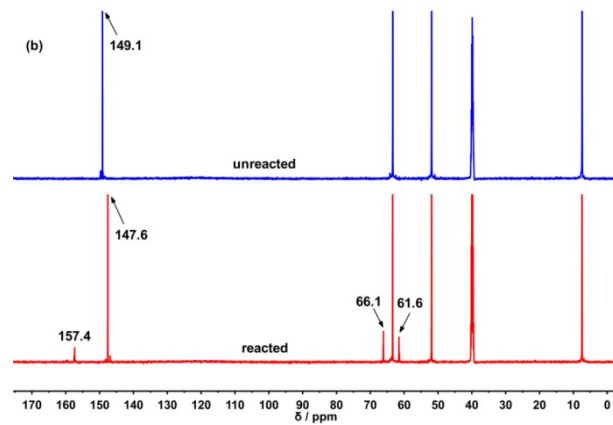

Fig. S2. The <sup>1</sup>H (a) and <sup>13</sup>C NMR (b) spectra of [N<sub>2222</sub>][Triz]-EG (1:2) before and after CO<sub>2</sub> uptake.

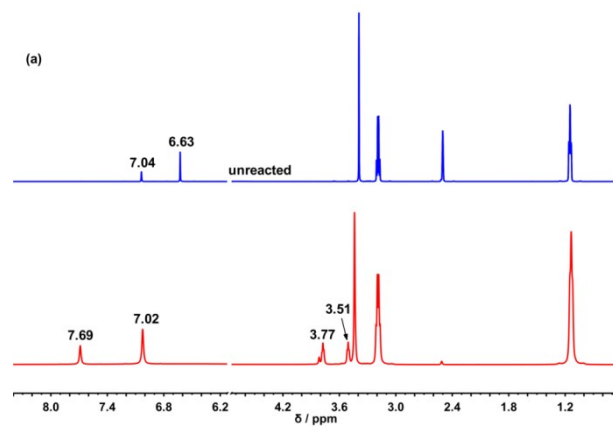

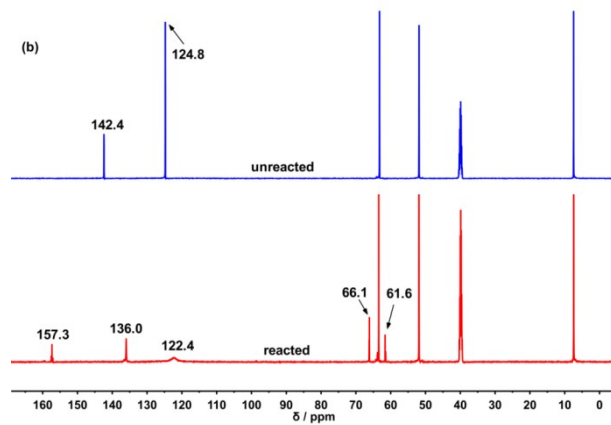

Fig. S3. The  $^1\text{H}$  (a) and  $^{13}\text{C}$  NMR (b) spectra of  $[\text{N}_{2222}][\text{Im}]\text{-EG}$  (1:2) before and after  $\text{CO}_2$  uptake.

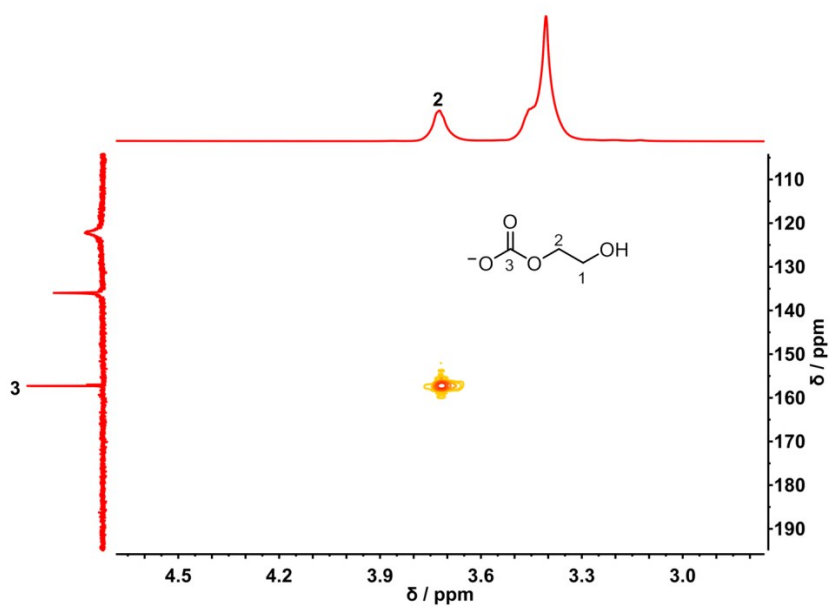

Fig. S4. The  $^1\text{H}$  -  $^{13}\text{C}$  HMBC spectra of  $[\text{P}_{2222}][\text{Im}]\text{-EG}$  (1:2) after  $\text{CO}_2$  uptake.

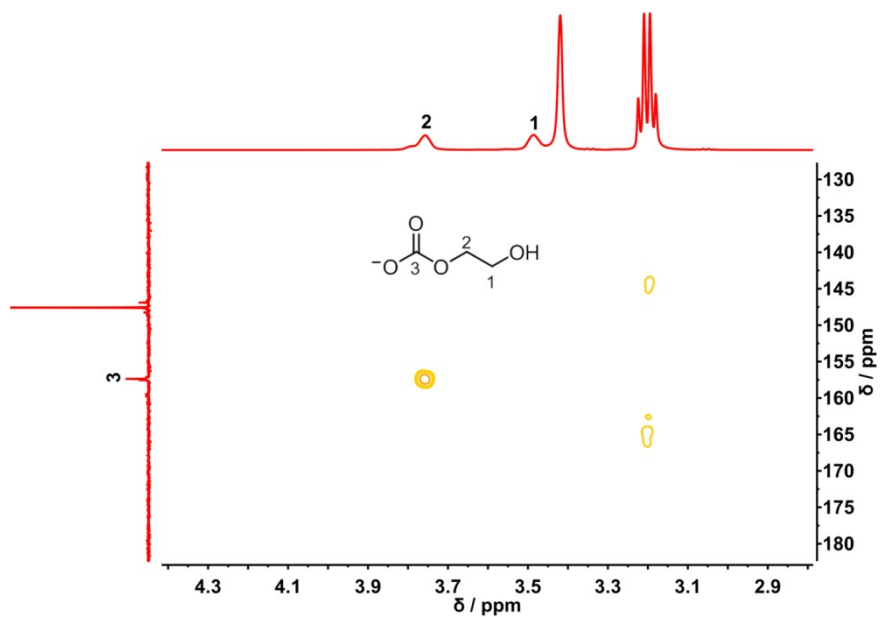

Fig. S5. The  $^1\text{H}$  -  $^{13}\text{C}$  HMBC spectra of  $[\text{N}_{2222}][\text{Triz}]\text{-EG}$  (1:2) after  $\text{CO}_2$  uptake.

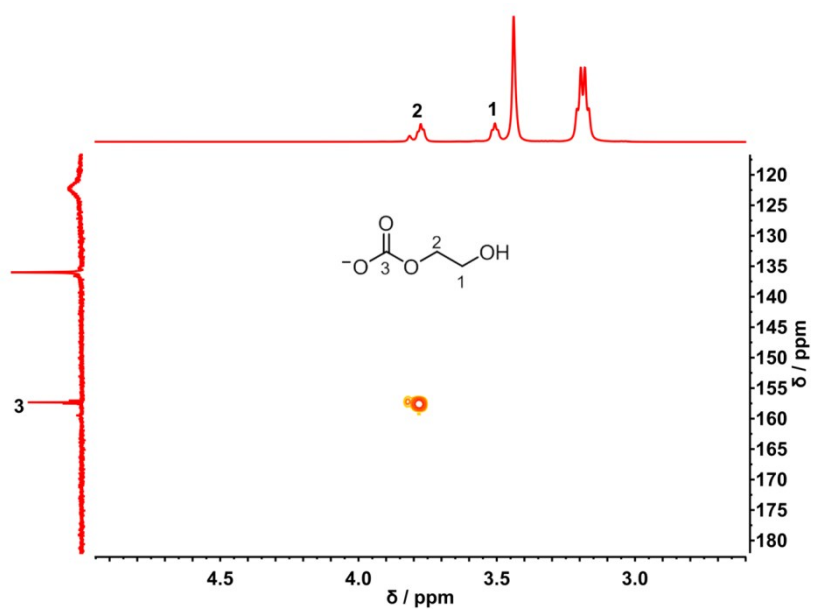

Fig. S6. The  $^1\text{H}$  -  $^{13}\text{C}$  HMBC spectra of  $[\text{N}_{2222}][\text{Im}]\text{-EG}$  (1:2) after  $\text{CO}_2$  uptake.

## References:

- [1] C. Wang, X. Luo, H. Luo, D.-e. Jiang, H. Li, S. Dai, *Angew. Chem. Int. Ed.*, **2011**, *50*, 4918-4922.
